# Supplementary material for: Assessment of Nutritional Status and Nutrition Impact Symptoms in Patients Undergoing Resection for Upper Gastrointestinal Cancer: Results from the Multi-Centre NOURISH Point Prevalence Study
Source: MDPI journal article supplement (doi:10.3390/nu13103349), 2021-09-24
Supplement: s1 [file s1]

**Supplementary Table S1. Unintentional Weight Loss by Surgery Type<sup>a</sup>**

| Variable                         | Overall |           | Oesophagectomy |           | Gastrectomy |           | Pancreatectomy |           | P value      |
|----------------------------------|---------|-----------|----------------|-----------|-------------|-----------|----------------|-----------|--------------|
| % LOW in > 6 months <sup>b</sup> | 8.3     | 4.3, 12.5 | 8.4            | 4.8, 15.1 | 8.7         | 5.5, 14.1 | 8.3            | 4.3, 11.9 | 0.531        |
| % LOW in 6 months <sup>b</sup>   | 7.4     | 3.8, 11.6 | 8.2            | 3.2, 12.7 | 5.2         | 3.6, 10.0 | 7.8            | 4.2, 11.5 | 0.647        |
| % LOW in 3 months <sup>b</sup>   | 4.8     | 1.8, 8.2  | 5.0            | 1.4, 6.7  | 3.1         | 0.0, 7.2  | 5.1            | 3.3, 9.6  | 0.084        |
| % LOW in 1 month <sup>b</sup>    | 1.3     | 0, 3.2    | 0.5            | 0.0, 2.5  | 0.0         | 0.0, 1.9  | 2.2            | 0.0, 4.8  | <b>0.021</b> |
| % LOW in 2 weeks <sup>b</sup>    | 0       | 0, 1.7    | 0.0            | 0.0, 1.0  | 0.0         | 0.0, 1.2  | 0.0            | 0.0, 2.5  | 0.268        |
| LOW ≥5% in 2 weeks (n, %)        |         |           |                |           |             |           |                |           | 0.434        |
| No                               | 175     | 95.6      | 60             | 96.8      | 45          | 97.8      | 70             | 93.3      |              |
| Yes                              | 8       | 4.4       | 2              | 3.2       | 1           | 2.2       | 5              | 6.7       |              |
| LOW ≥5% in 1 month (n, %)        |         |           |                |           |             |           |                |           | 0.299        |
| No                               | 165     | 90.7      | 60             | 93.8      | 40          | 93.0      | 65             | 86.7      |              |
| Yes                              | 17      | 9.3       | 4              | 6.3       | 3           | 7.0       | 10             | 13.3      |              |
| LOW ≥5% in 3 months (n, %)       |         |           |                |           |             |           |                |           | 0.665        |
| No                               | 128     | 69.6      | 43             | 68.3      | 33          | 75.0      | 52             | 67.5      |              |
| Yes                              | 56      | 30.4      | 20             | 31.7      | 11          | 25.0      | 25             | 32.5      |              |
| LOW ≥5% in 6 months (n, %)       |         |           |                |           |             |           |                |           | 0.588        |
| No                               | 109     | 58.0      | 37             | 56.9      | 29          | 64.4      | 43             | 55.1      |              |
| Yes                              | 79      | 42.0      | 28             | 43.1      | 16          | 35.6      | 35             | 44.9      |              |
| LOW ≥5% in > 6 months (n, %)     |         |           |                |           |             |           |                |           | 0.943        |
| No                               | 95      | 51.1      | 32             | 51.6      | 23          | 48.9      | 40             | 51.9      |              |
| Yes                              | 91      | 48.9      | 30             | 48.4      | 24          | 51.1      | 37             | 48.1      |              |
| LOW ≥10% in 2 weeks (n, %)       |         |           |                |           |             |           |                |           | -            |
| No                               | 183     | 100       | 62             | 100       | 46          | 100       | 75             | 100       |              |
| Yes                              | 0       | 0         | 0              | 0         | 0           | 0         | 0              | 0         |              |
| LOW ≥10% in 1 month (n, %)       |         |           |                |           |             |           |                |           | 0.272        |
| No                               | 176     | 97.8      | 64             | 100       | 41          | 9.6       | 71             | 95.9      |              |
| Yes                              | 4       | 2.2       | 0              | 0         | 1           | 2.4       | 3              | 4.1       |              |
| LOW ≥10% in 3 months (n, %)      |         |           |                |           |             |           |                |           | 0.270        |
| No                               | 163     | 90.6      | 57             | 91.9      | 41          | 95.3      | 65             | 86.7      |              |
| Yes                              | 17      | 9.4       | 5              | 8.1       | 2           | 4.7       | 10             | 13.1      |              |
| LOW ≥10% in 6 months (n, %)      |         |           |                |           |             |           |                |           | 0.401        |
| No                               | 140     | 77.8      | 47             | 74.6      | 35          | 85.4      | 58             | 76.3      |              |
| Yes                              | 40      | 22.2      | 16             | 25.4      | 6           | 14.6      | 18             | 23.7      |              |
| LOW ≥10% in > 6 months (n, %)    |         |           |                |           |             |           |                |           | 0.898        |
| No                               | 126     | 72.8      | 43             | 71.7      | 31          | 75.6      | 52             | 72.2      |              |
| Yes                              | 47      | 27.2      | 17             | 28.3      | 10          | 24.4      | 20             | 27.8      |              |

<sup>a</sup> Data reported for those with weight data available for each timeframe, missing data excluded.

<sup>b</sup> Presented as median (IQR). LOW=Loss of Weight
